# Supplementary material
Source: PubMed Central journal article supplement (PMC7685744)

A

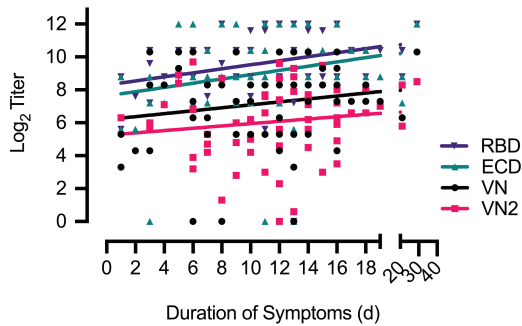

B

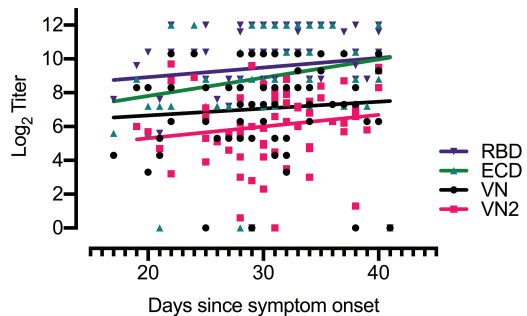

C

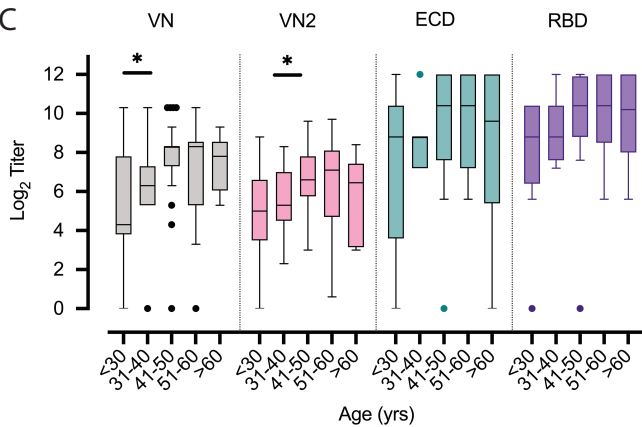

D

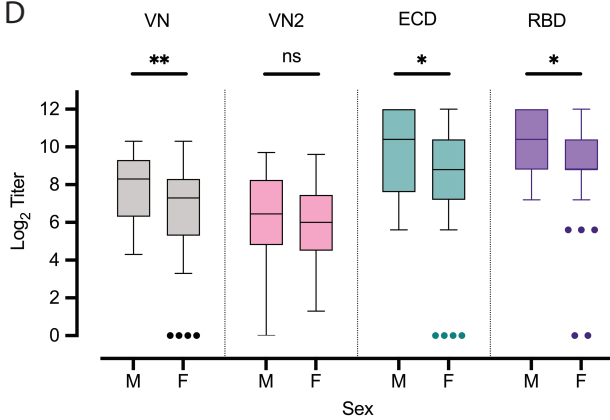

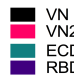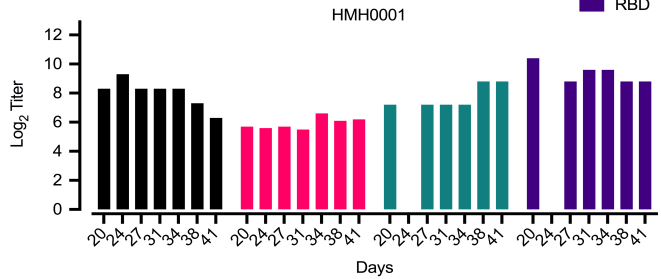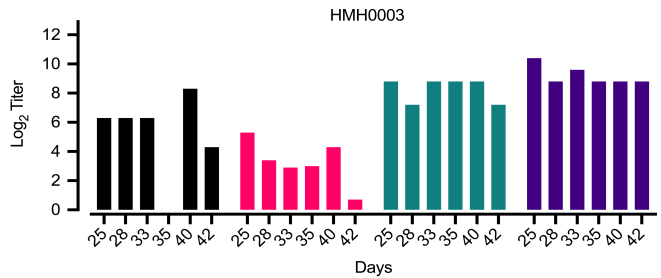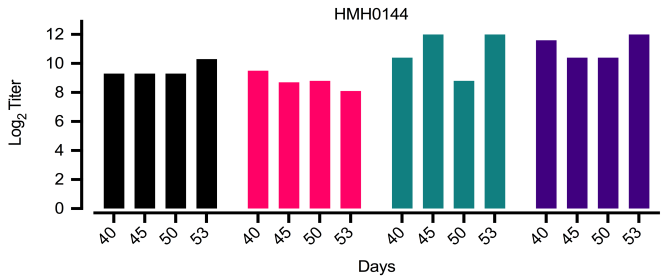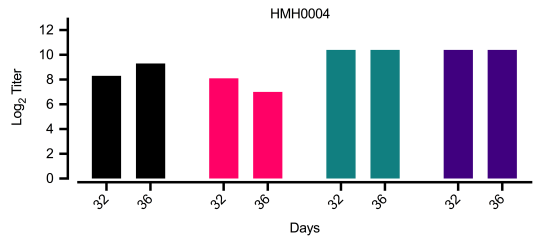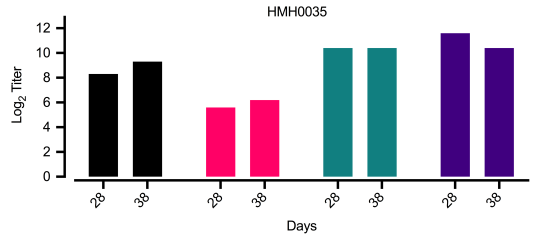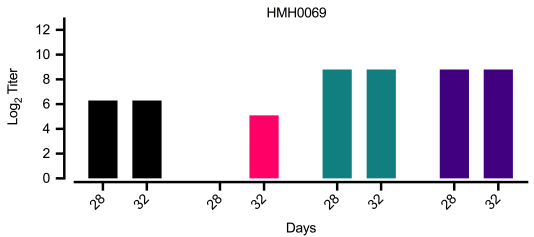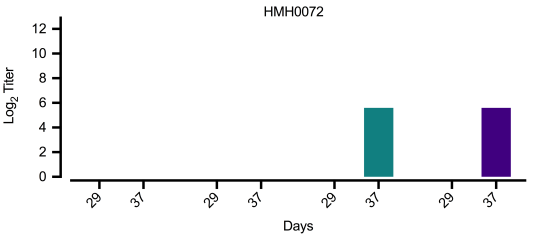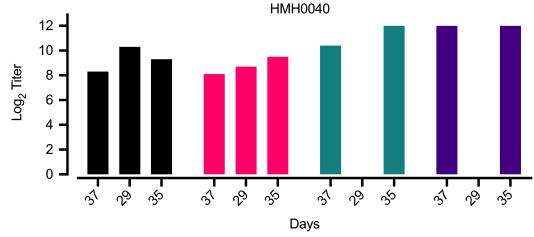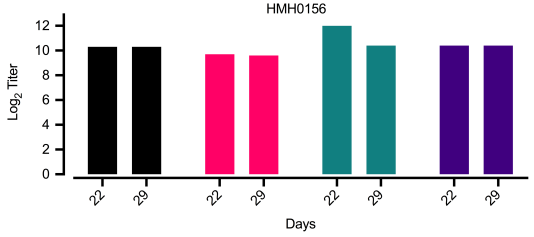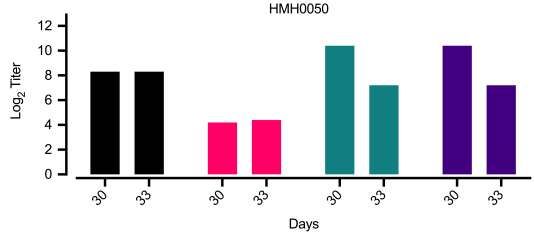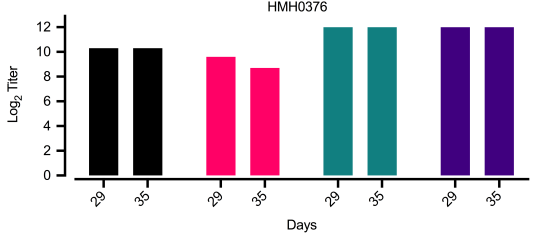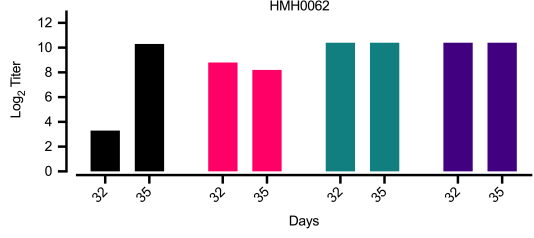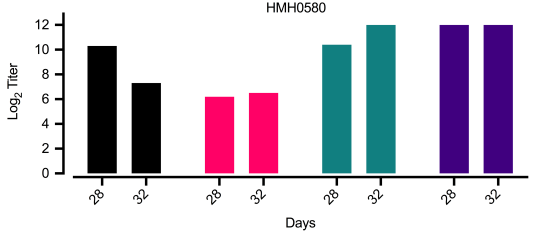

A

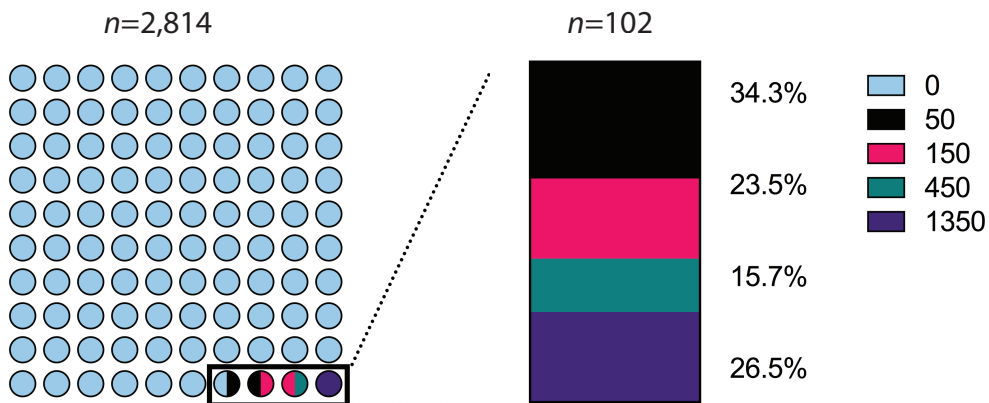

B

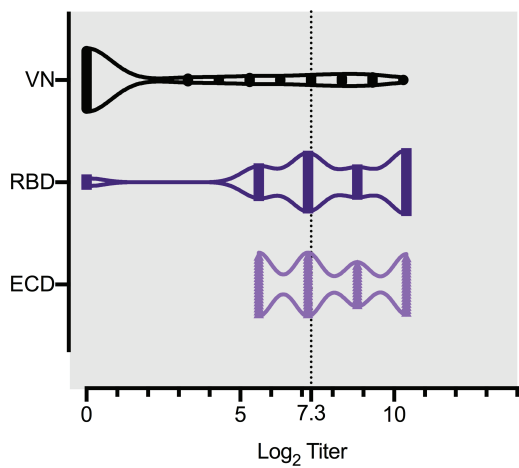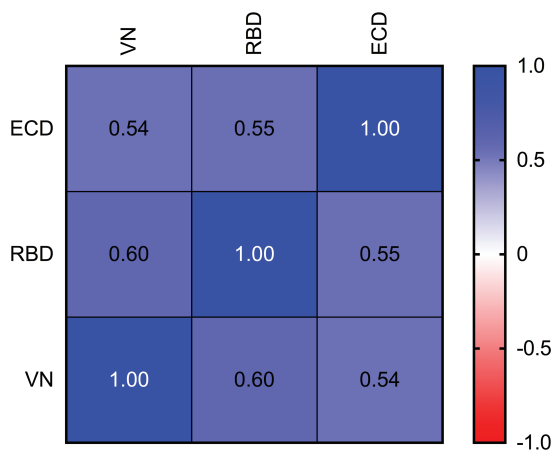

Supplement: jci-130-141206-s421.pdf [file jci-130-141206-s421.pdf]
